# Supplementary material
Source: HighWire-hosted journal article supplement (http://jpet.aspetjournals.org/highwire/filestream/143245/field_highwire_adjunct_files/0/Supplemental_material_JPET_248997.pdf)
Supplement: Supplemental_material_JPET_248997.pdf [file Supplemental_material_JPET_248997.pdf]

## **Supplemental material**

### **Targeting Canine *KIT* Promoter by Candidate DNA G-quadruplex Ligands**

#### **Authors:**

Eleonora Zorzan, Silvia Da Ros, Mery Giantin, Lara Zorro Shahidian, Giorgia Guerra, Manlio Palumbo, Claudia Sissi, and Mauro Dacasto

The Journal of Pharmacology and Experimental Therapeutics

**Supplementary Table 1.** qPCR assay standard curve parameters obtained in C2 and NI-1 cell lines.

| Gene                          | C2    |                |                    | NI-1  |                |                    |
|-------------------------------|-------|----------------|--------------------|-------|----------------|--------------------|
|                               | Slope | Efficiency (%) | Dynamic range (Ct) | Slope | Efficiency (%) | Dynamic range (Ct) |
| <i>ATP5<math>\beta</math></i> | -3.26 | 102.7          | 19.17-30.39        | -3.39 | 97.4           | 17.87-29.09        |
| <i>BCL2</i>                   | -3.42 | 95.9           | 26.36-36.46        | -3.49 | 93.6           | 25.62-37.20        |
| <i>CCZI</i>                   | -3.34 | 99.2           | 25.30-33.35        | -3.37 | 98.2           | 22.14-33.10        |
| <i>CGI-119</i>                | -3.43 | 95.7           | 23.23-31.64        | -3.30 | 101            | 22.55-34.05        |
| <i>GOLGA1</i>                 | -3.28 | 101.8          | 25.60-36.74        | -3.23 | 104            | 25.36-36.18        |
| <i>KIT</i>                    | -3.32 | 99.9           | 17.67-28.85        | -3.34 | 99             | 18.05-29.05        |
| <i>KRAS</i>                   | -3.33 | 99.7           | 20.97-32.11        | -3.33 | 99.7           | 22.35-32.22        |
| <i>MYC</i>                    | -3.34 | 99.4           | 22.40-33.06        | -3.28 | 101.7          | 21.82-31.17        |
| <i>VEGFA</i>                  | -3.29 | 101.4          | 22.04-31.05        | -3.27 | 102.2          | 22.90-34.18        |
| <i>TERT</i>                   | -3.21 | 105.1          | 27.12-37.92        | -3.28 | 101.7          | 27.99-36.02        |

*ATP5 $\beta$* , ATP synthase, H<sup>+</sup> transporting, mitochondrial F1 complex, beta polypeptide; *BCL2*, B-cell leukemia/lymphoma 2; *CGI-119*, transmembrane BAX inhibitor motif containing 4; *CCZI*, vacuolar protein trafficking and biogenesis associated homolog; *KIT*, v-kit Hardy-Zuckerman 4 feline sarcoma viral oncogene homolog; *GOLGA1*, Golgin A1; ICG, internal control gene; *KRAS*, Kirsten rat sarcoma viral oncogene homolog; *MYC*, v-myc avian myelocytomatosis viral oncogene homolog; qPCR, quantitative Real-time RT-PCR; *TERT*, telomerase reverse transcriptase; *VEGFA*, vascular endothelial growth factor A.

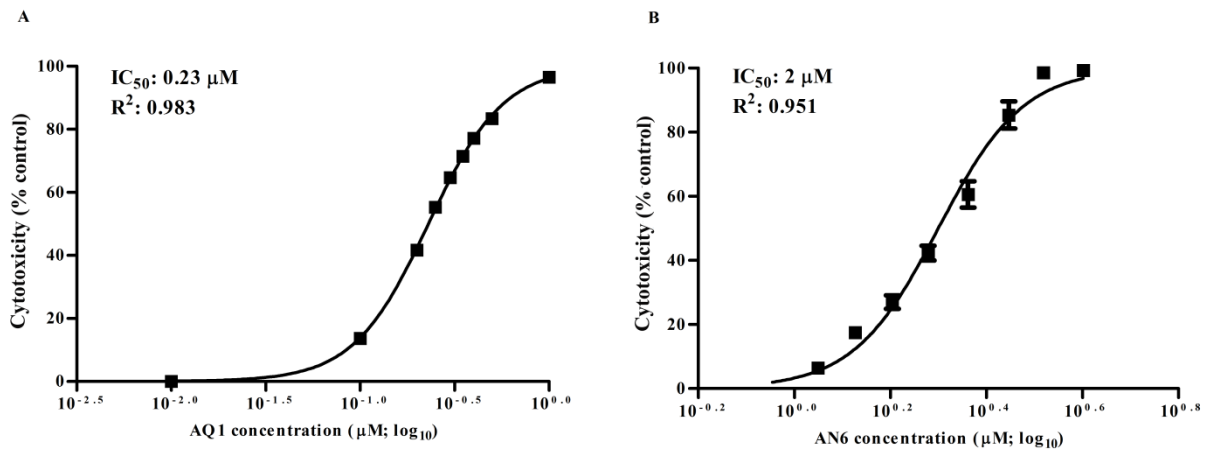

**Supplementary Figure 1. Cytotoxicity (dose-response curves) of AQ1 and AN6 in canine NI-1 MCT cell line.** NI-1 cells were exposed to AQ1 (A) and AN6 (B) and their cytotoxicity was measured using the Alamar blue assay. Cytotoxicity was calculated as  $[100 - (T/\text{control mean} * 100)]$ . Data are expressed as mean values  $\pm$  standard deviation (S.D.) of three independent experiments (each concentration performed in sestuplicate) performed in different passages.

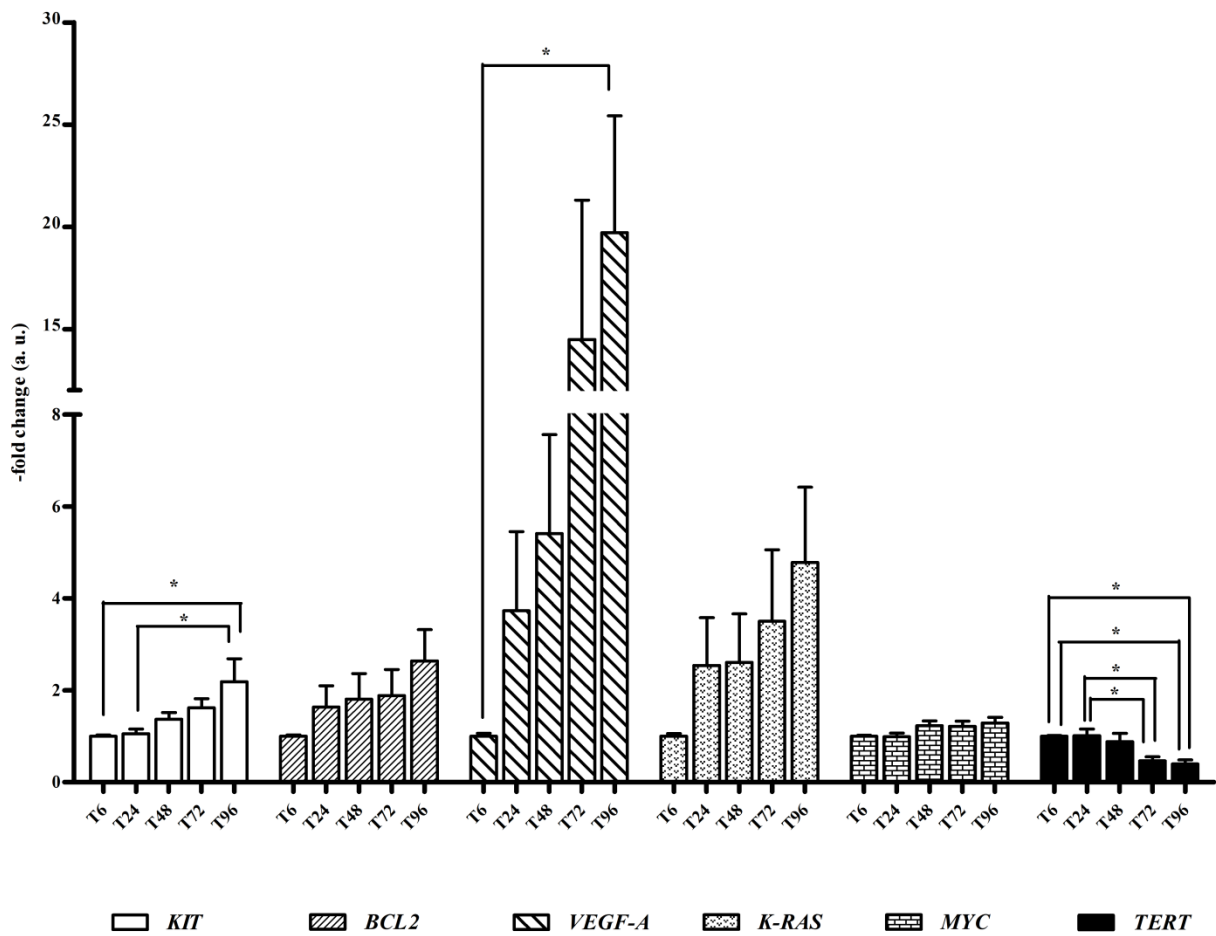

**Supplementary Figure 2. Effects of culturing time (6, 24, 48, 72, 96 hours) on the expression of genes containing putative G4 structures in their promoter in the canine NI-1 MCT cell line.**

Total RNA was isolated from NI-1 cells and *KIT*, *BCL2*, *VEGFA*, *KRAS*, *MYC* and *TERT* mRNA levels were measured using qPCR. Data (arithmetic means  $\pm$  S.D.) are expressed as n-fold change (a.u.) normalized to the RQ mean value of cells stopped at T<sub>6</sub>, to whom an arbitrary value of 1 was assigned. Experiments were performed in triplicate and, for each experiment, three biological replicates were included. The one-way ANOVA was used to measure statistical differences between different times culture. \* :  $P < 0.05$ .

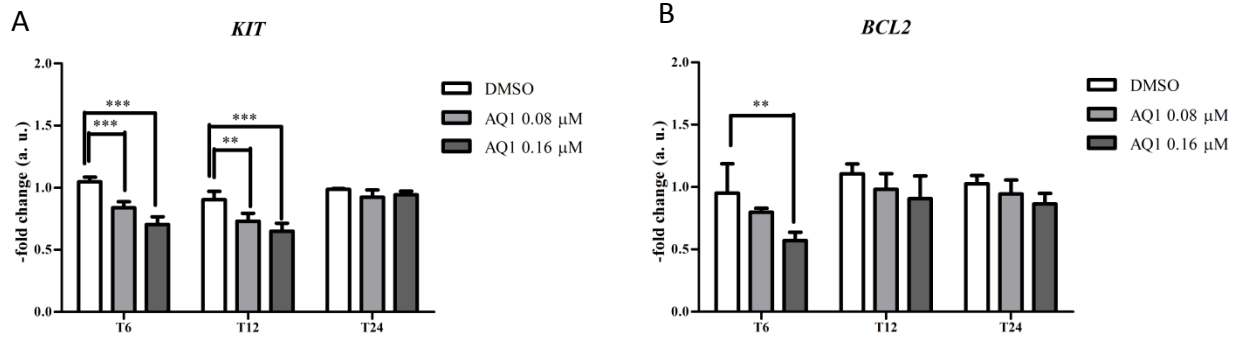

**Supplementary Figure 3. Effect of AQ1 (0.08 μM and 0.16 μM) on *KIT* (A) and *BCL2* (B) mRNA levels in canine NI-1 MCT cell line.** Gene expression profiles were measured by using qPCR, and data (arithmetic means ± S.D.) are expressed as n-fold change (a.u.) normalized to the RQ value of corresponding control cells (T<sub>6</sub>, T<sub>12</sub>, T<sub>24</sub>) to whom an arbitrary value of 1 was assigned. Experiments were performed in triplicate and, for each experiment, three biological replicates were included. Two-way ANOVA and Bonferroni post-test were used to check for statistical differences between doses and time of treatment. \*\*:  $P < 0.01$ ; \*\*\*:  $P < 0.001$ .

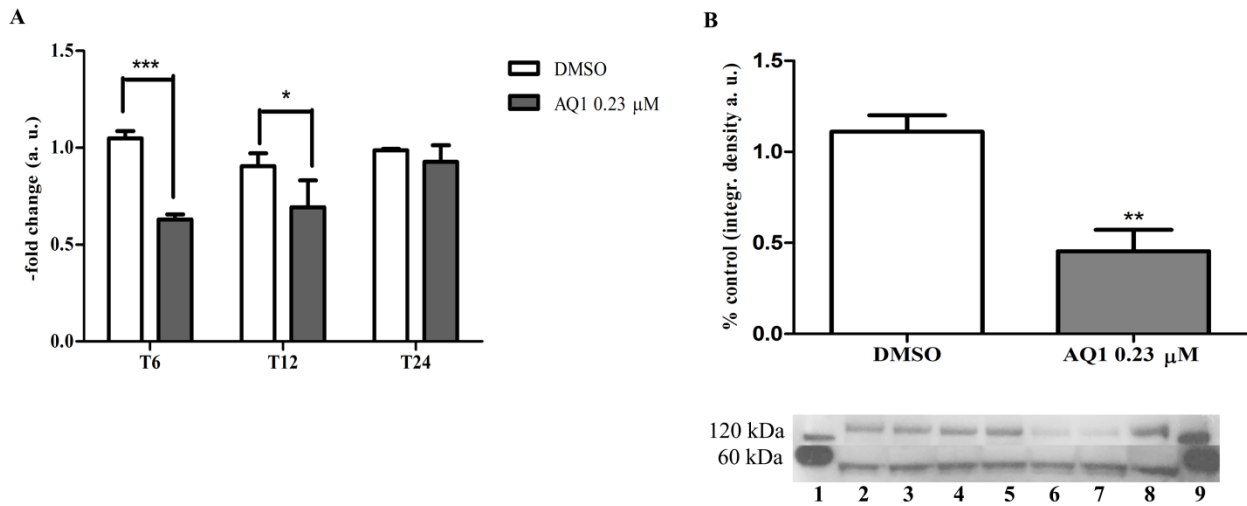

**Supplementary Fig. 4. Effect of AQ1 (0.23 μM) on *KIT* gene expression (A) and c-kit protein (B) in the canine NI-1 MCT cell line.** (A) *KIT* mRNA levels were measured by qPCR, and data (arithmetic means ± S.D.) are expressed as n-fold change (a.u.) normalized to the RQ of control cells at each time (T<sub>6</sub>, T<sub>12</sub>, T<sub>24</sub>), to whom an arbitrary value of 1 was assigned. Experiments were performed in triplicate and, for each experiment, three biological replicates were included. Two-way ANOVA and Bonferroni post-test were used to find out statistical differences between doses and time of treatment. (B) The effect of AQ1 on c-kit protein amount was measured by using immunoblotting, and data are expressed as n-fold change (a.u.) with respect to the untreated cells densitometry. Experiments were performed in triplicate and, for each experiment, three biological replicates were included. The Student *t*-test was used to check for statistical differences between cells treated with AQ1 and those treated with the vehicle only (DMSO). A representative immunoblot image is reported. Legend: 1, ladder; 2-3, control cells; 4-5, DMSO (vehicle); 6-7, cells exposed to AQ1 (24 hours); 8, TF1 control cells; 9, ladder. \*, \*\*, \*\*\*:  $P < 0.05$ ;  $P < 0.01$ ;  $P < 0.001$ .

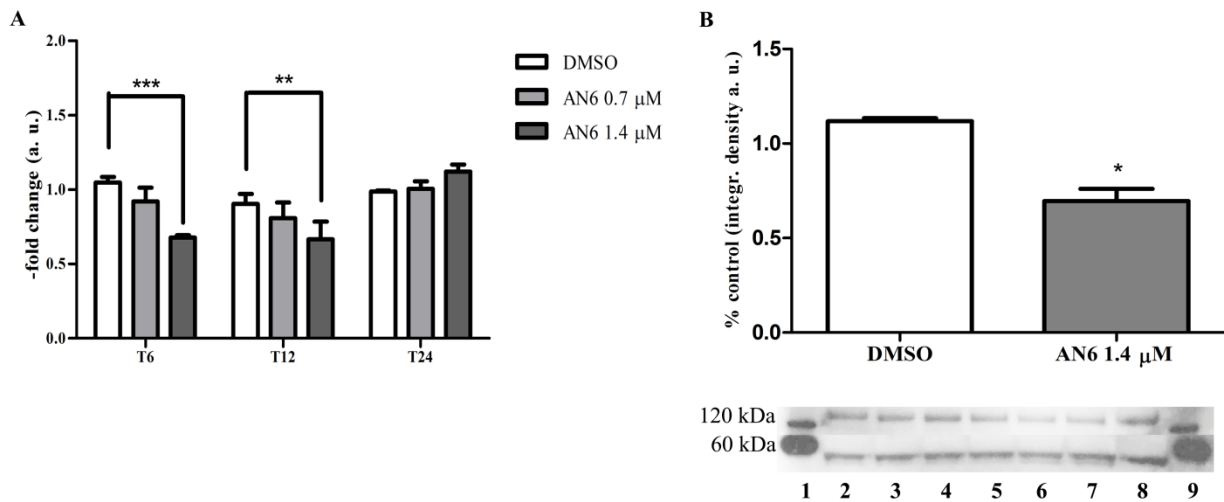

**Supplementary Figure 5. Effect of AN6 (0.7  $\mu$ M and 1.4  $\mu$ M) on *KIT* mRNA levels (A) and c-kit protein (B) in canine NI-1 MCT cell line.** (A) Gene expression profiles were measured by using qPCR, and data (arithmetic means  $\pm$  S.D.) are expressed as n-fold change (a.u.) normalized to the RQ value of corresponding control cells (T<sub>6</sub>, T<sub>12</sub>, T<sub>24</sub>) to whom an arbitrary value of 1 was assigned. Experiments were performed in triplicate and, for each experiment, three biological replicates were included. Two-way ANOVA and Bonferroni post-test were used to check for statistical differences between doses and time of treatment. (B) The effect of AN6 on c-kit protein amount was measured by immunoblotting, and data are expressed as n-fold change (a.u.) with respect to the untreated cells densitometry. Experiments were performed in triplicate and, for each experiment, three biological replicates were included. The Student t-test was used to check for statistical differences between cells treated with AN6 and those treated with the vehicle only (DMSO). A representative immunoblot image is shown. Legend: 1, ladder; 2-3, control cells; 4-5, DMSO (vehicle); 6-7, cells exposed to AN6 (24 hours); 8, TF1 control cells; 9, ladder. \*, \*\*, \*\*\*:  $P < 0.05$ ;  $P < 0.01$ ;  $P < 0.001$ .
